# Supplementary material for: Peptide-Mediated Gene Transfer into Marine Purple Photosynthetic Bacteria
Source: MDPI journal article supplement (doi:10.3390/ijms21228625), 2020-11-16
Supplement: s1 [file s1]

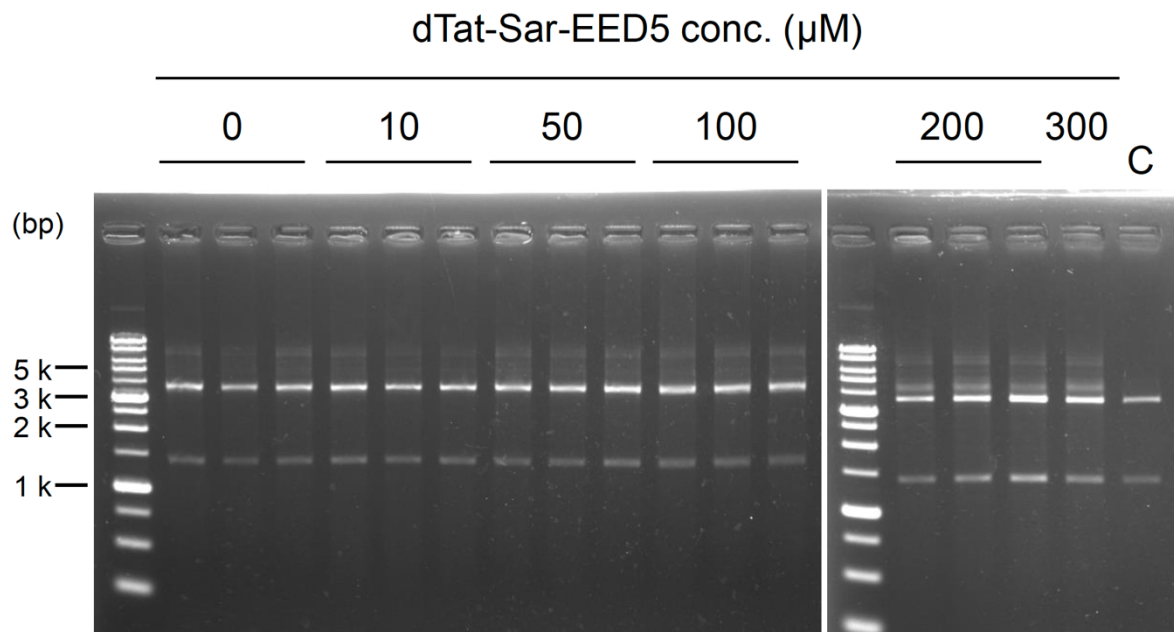

**Figure S1.** Plasmid extraction and restriction digestion of kanamycin resistant colonies of *R. sulfidophilum*. Plasmid solutions extracted from kanamycin resistant colonies were digested with *Bgl*II and *Hind*III and analyzed by 1% agarose gel. The pDNA delivery were carried out in the presence of different concentrations of dTat-Sar-EED5 (0, 10, 50, 100, 200, 300  $\mu\text{M}$ ).

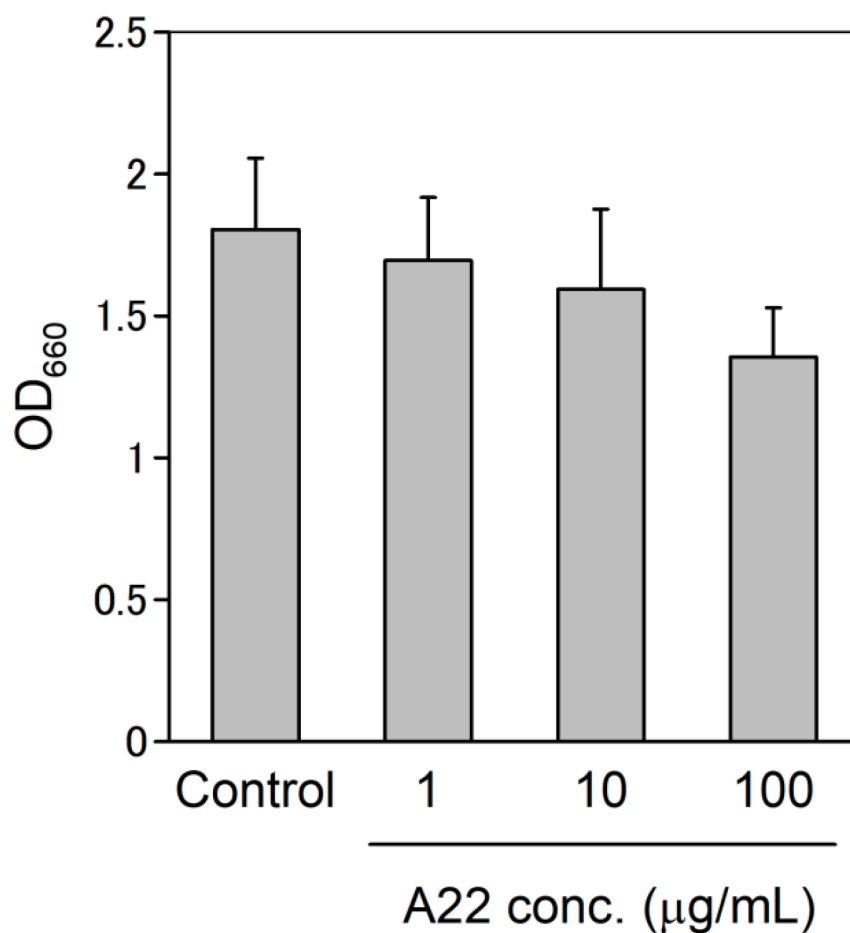

**Figure S2.** Effect of A22 on growth of *R. sulfidophilum*. *R. sulfidophilum* cells were incubated with different concentrations of A22 (1, 10 and 100  $\mu\text{g/mL}$ ) for 1.5 h. After removing the reaction mixture by centrifugation, cells were cultured in growth medium overnight and  $OD_{660}$  was measured. Data are the mean  $\pm$  SD of at four cell cultures.

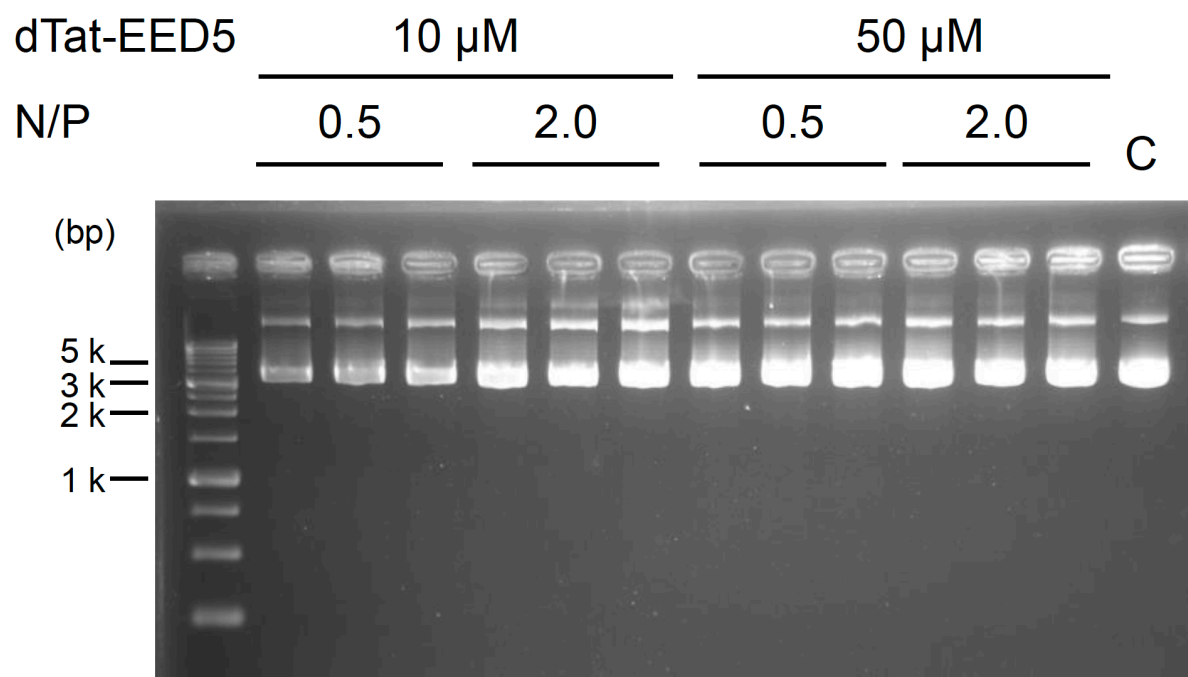

**Figure S3.** Plasmid extraction from ampicillin resistant colonies of *E. coli*. Plasmid solutions extracted from ampicillin resistant colonies were analyzed by 1% agarose gel. Experiments were carried out in the presence of 10 and 50  $\mu$ M of dTat-Sar-EED5. N/P ratio was set to 0.5 and 2.0.
